# Supplementary material for: Fabrication of a water-soluble near-infrared fluorescent probe for selective detection and imaging of dipeptidyl peptidase IV in biological systems
Source: Royal Society of Chemistry journal article supplement (doi:10.1039/c9tb02301a), 2019-12-17
Supplement: c9tb02301a1.pdf [file c9tb02301a1.pdf]

## **Electronic Supplementary Information (ESI)**

### **Fabrication of a water-soluble near-infrared fluorescent probe for selective detection and imaging of dipeptidyl peptidase IV in biological system**

Xiumei Guo<sup>a</sup>, Shuai Mu<sup>a</sup>, Jian Li<sup>a</sup>, Yintang Zhang<sup>b</sup>, Xiaoyan Liu<sup>a\*</sup>, Haixia Zhang<sup>a</sup>,  
Hong Gao<sup>a\*</sup>

<sup>a</sup>State Key Laboratory of Applied Organic Chemistry, Key Laboratory of Nonferrous Metals Chemistry and Resources Utilization of Gansu Province and College of Chemistry and Chemical Engineering, Lanzhou University, Lanzhou 730000, China.

<sup>b</sup>Henan Key Laboratory of Biomolecular Recognition and Sensing, College of Chemistry and Chemical Engineering, Shangqiu Normal University, Shangqiu 476000, China.

#### **Table of Contents**

**Section 1. Synthesis and characterizations of the probe**

**Section 2. The mechanism study on HCA-D for detection of DPP-IV**

**Section 3. Effect of solvent on the activity of DPP-IV**

**Section 4. Evaluation of the analysis methods for detection of DPP-IV activity**

**Section 5. Inhibition assay of DPP-IV activity**

**Section 6. Determination of DPP-IV activity in practical samples**

**Section 7. Cell cytotoxicity of HCA-D**

---

\* Corresponding author Tel: +86-931-8912510; fax: +86-931-8912582;

E-mail: [liuxiaoy@lzu.edu.cn](mailto:liuxiaoy@lzu.edu.cn)

## Section 1. Synthesis and characterizations of the probe

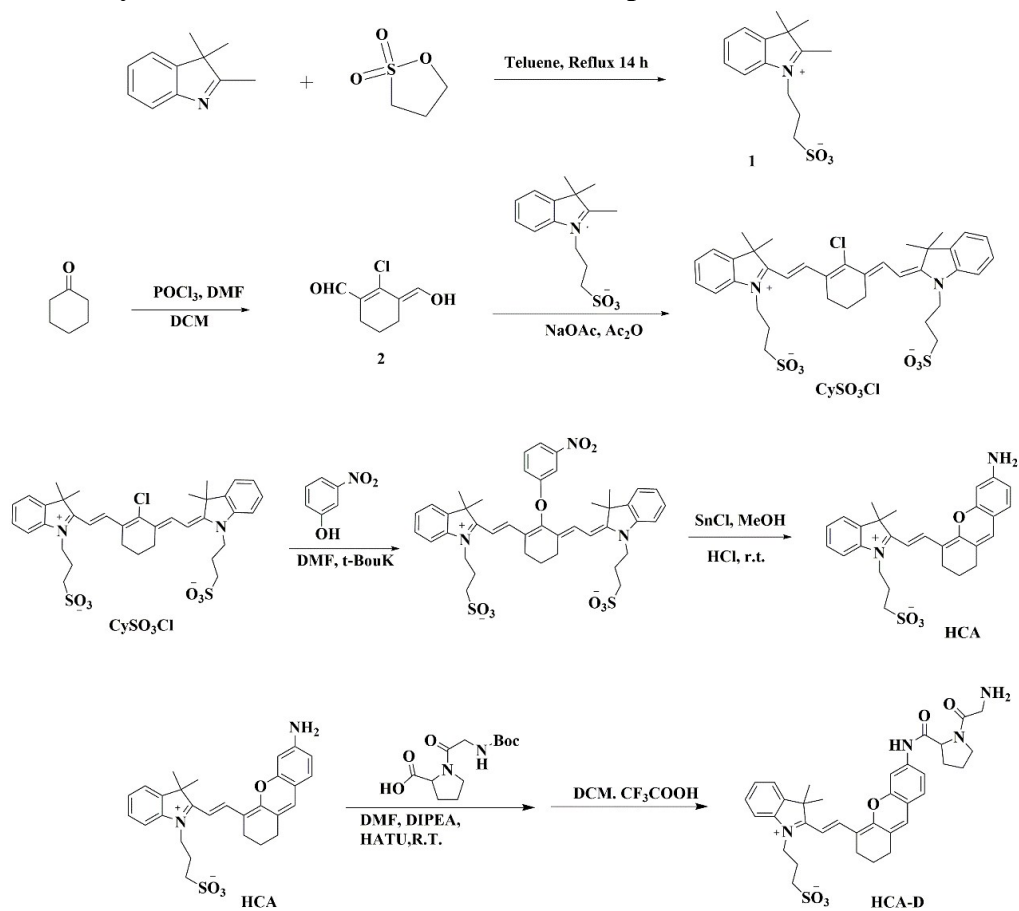

**Figure S1** The synthesis procedure of HCA-D.

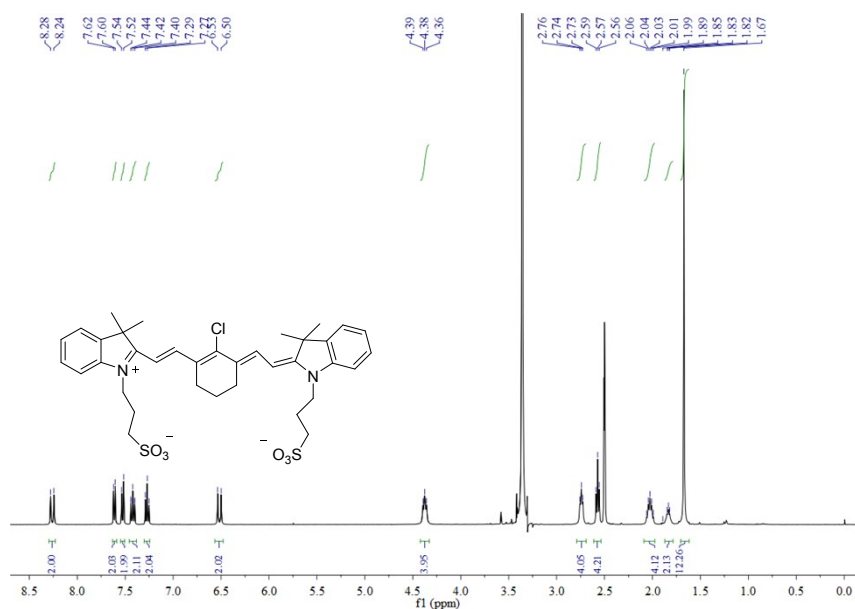

**Figure S2** <sup>1</sup>H NMR spectrum of **CySO<sub>3</sub>Cl** in DMSO-d<sub>6</sub>

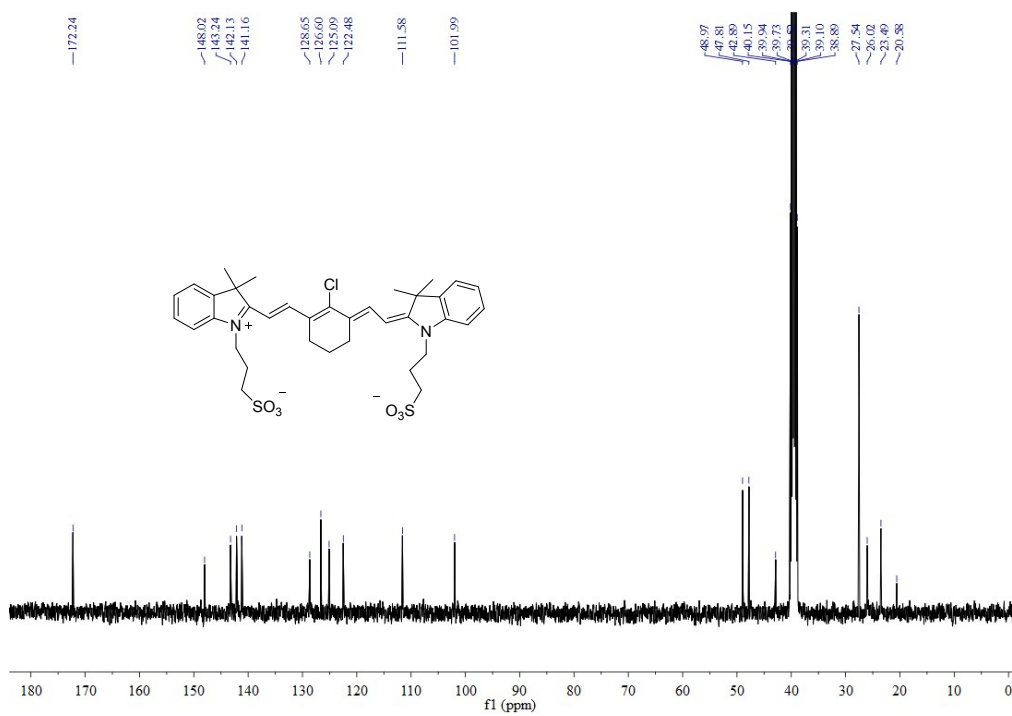

Figure S3 <sup>13</sup>C NMR spectrum of **CySO<sub>3</sub>Cl** in DMSO-d<sub>6</sub>

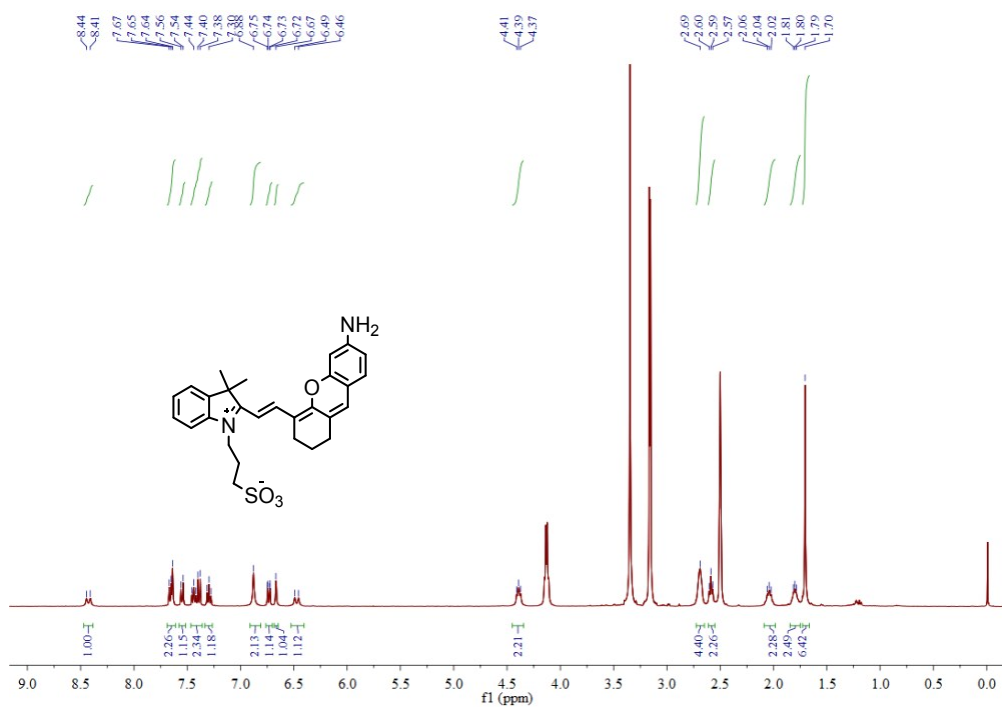

Figure S4 <sup>1</sup>H NMR spectrum of **HCA** in DMSO-d<sub>6</sub>

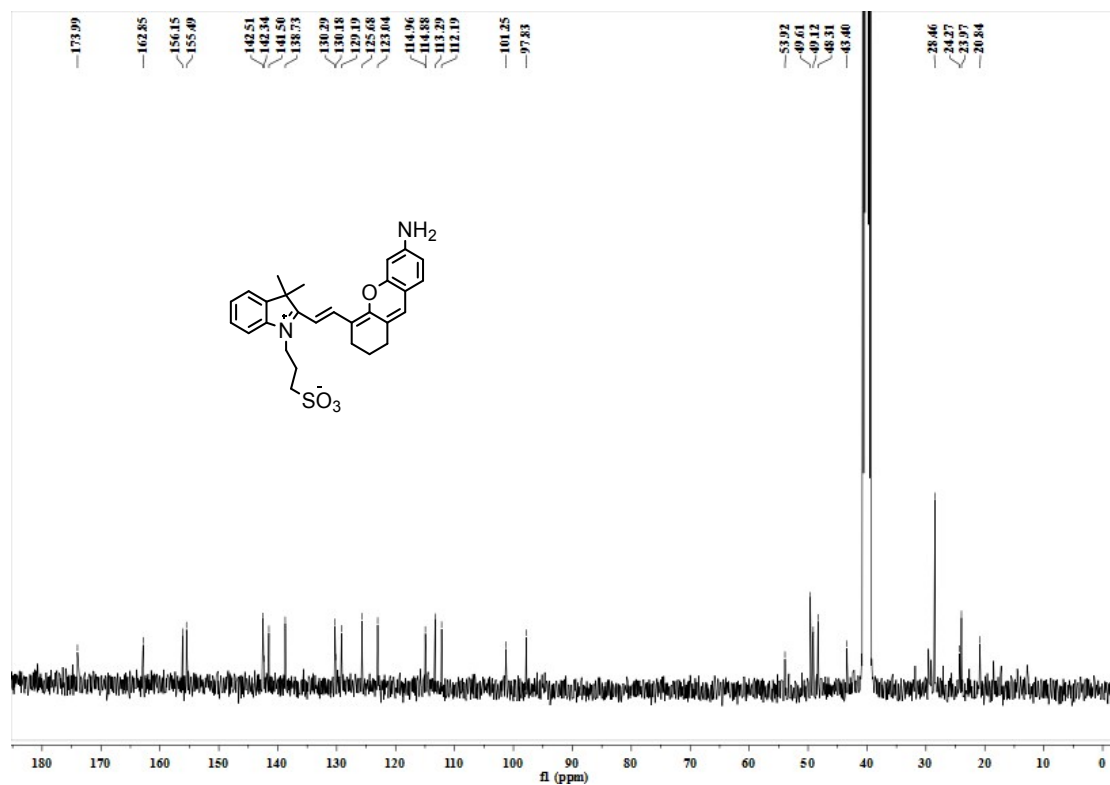

Figure S5  $^{13}\text{C}$  NMR spectrum of HCA in  $\text{DMSO-d}_6$

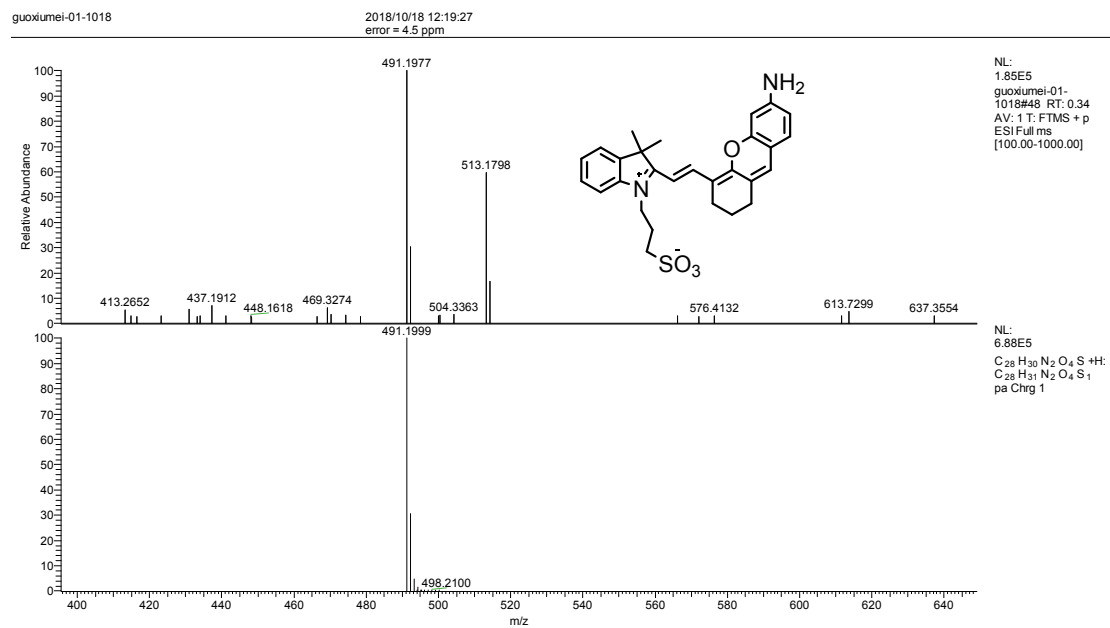

Figure S6 HRMS spectra of HCA

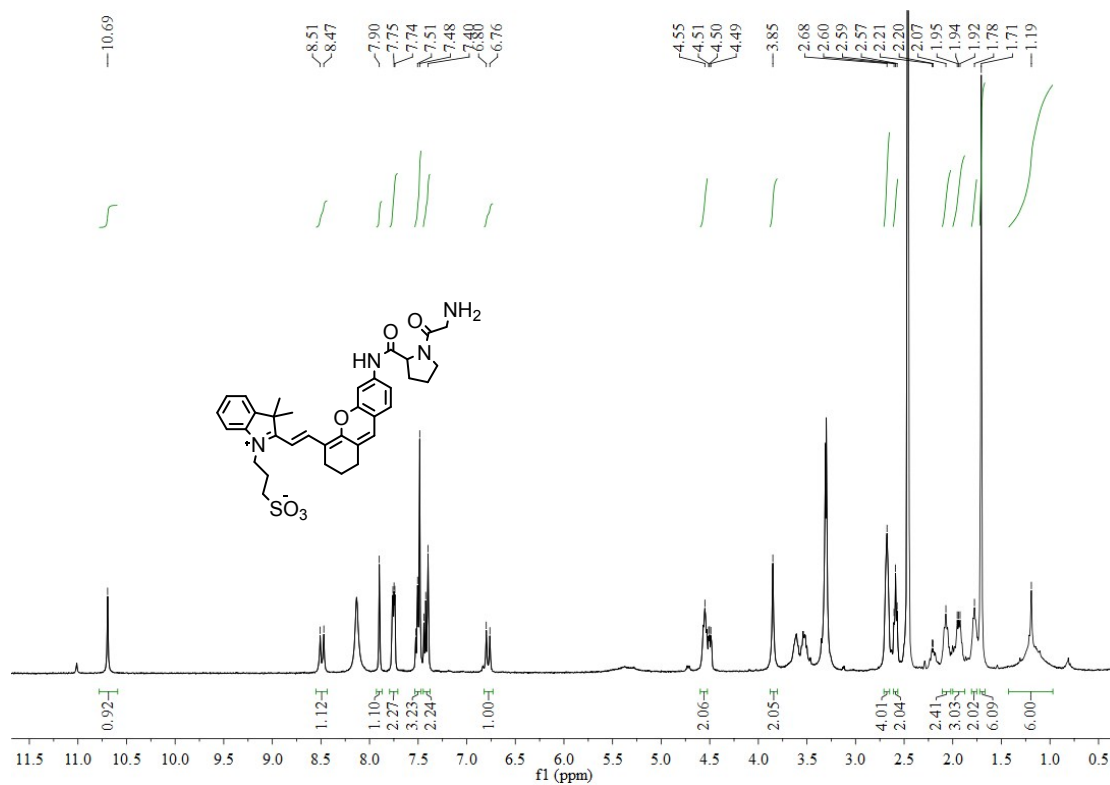

Figure S7 <sup>1</sup>H NMR spectrum of HCA-D in DMSO-d<sub>6</sub>

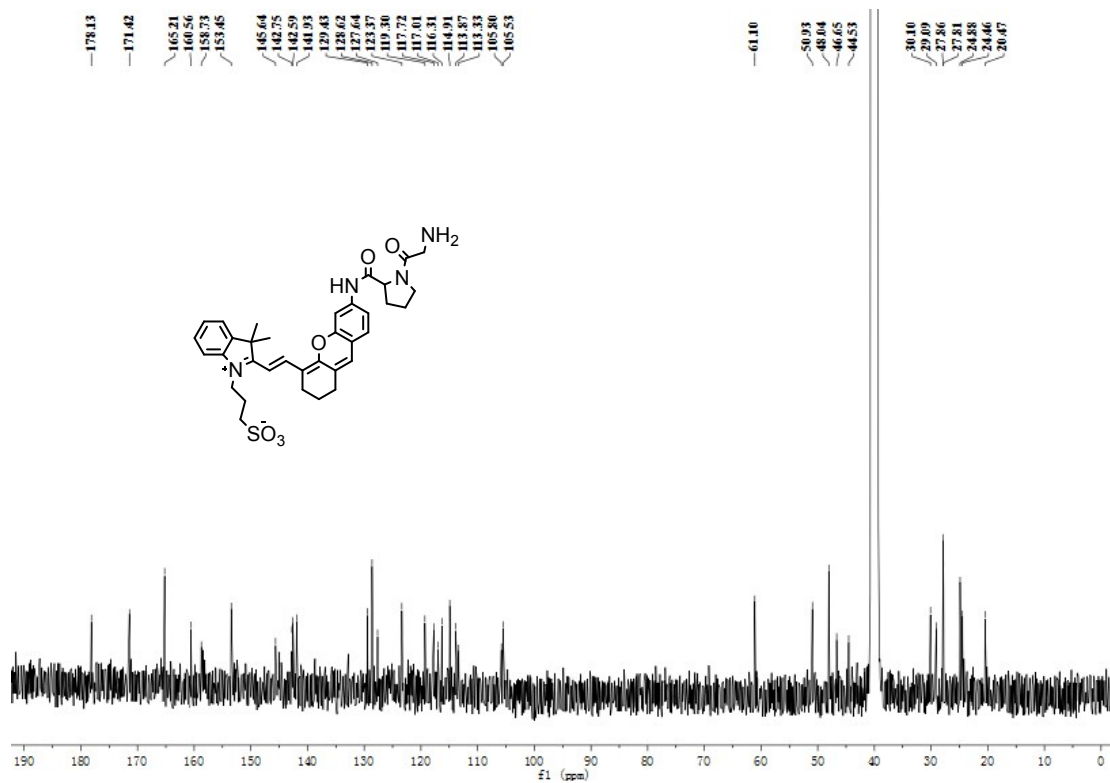

Figure S8 <sup>13</sup>C NMR spectrum of HCA-D in DMSO-d<sub>6</sub>

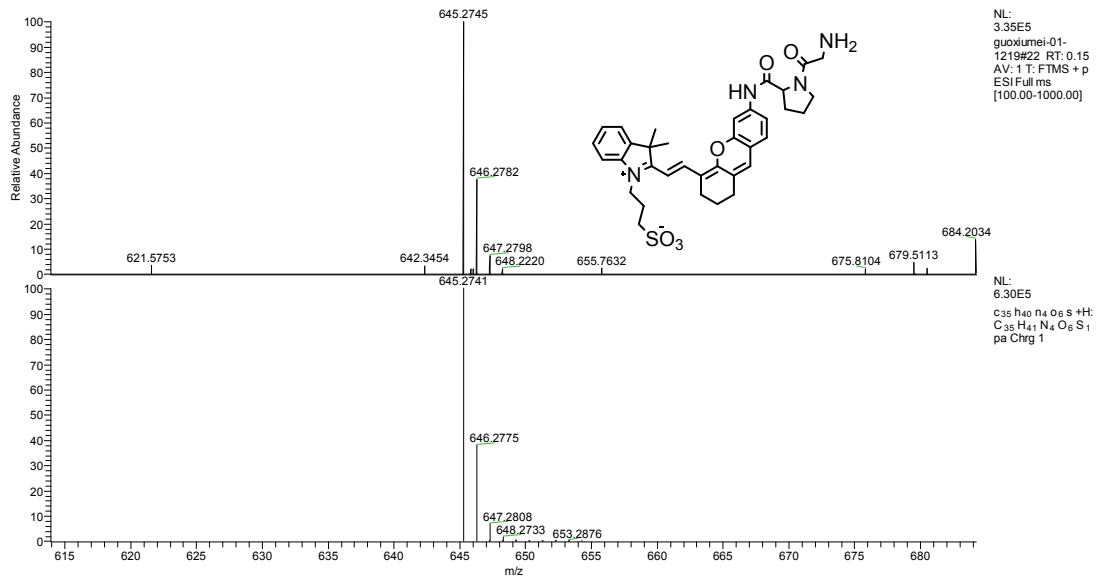

Figure S9 HRMS spectra of HCA-D

## Section 2 The mechanism study on HCA-D for detection of DPP-IV

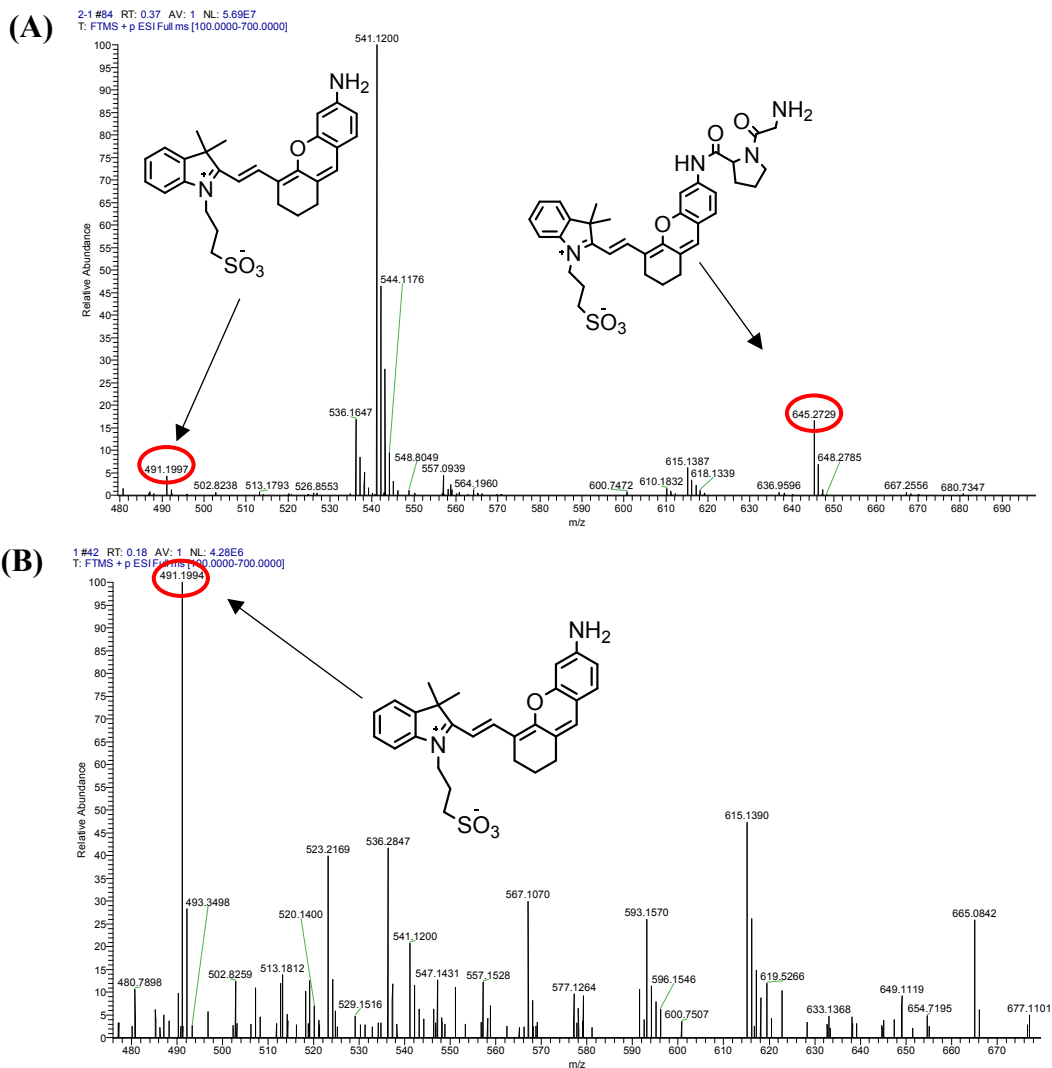

**Figure S10** HRMS spectra of the reaction products of HCA-D (30  $\mu$ M) and DPP-IV at concentration of 5 ng/mL (A) and 40 ng/mL (B).

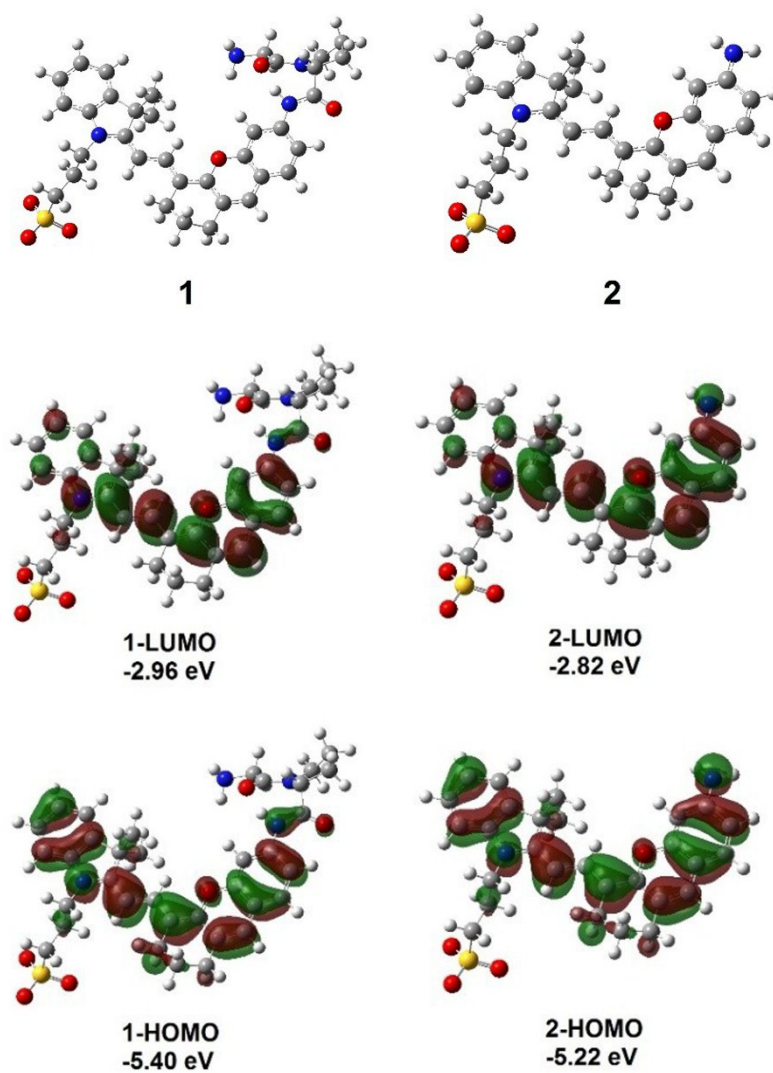

**Figure S11** The molecular structure of the probe (HCA-D) and fluorophore (HCA) optimized (top), and the main electronic energy level distribution calculated through density functional theory (DFT) (B3LYP/6-311G (d, p)/level, Gaussian 09). In the stick model, carbon, oxygen, nitrogen and sulfur atoms are labeled as gray, red, blue, and yellow, respectively.



### Section 3 Effect of solvent on the activity of DPP-IV

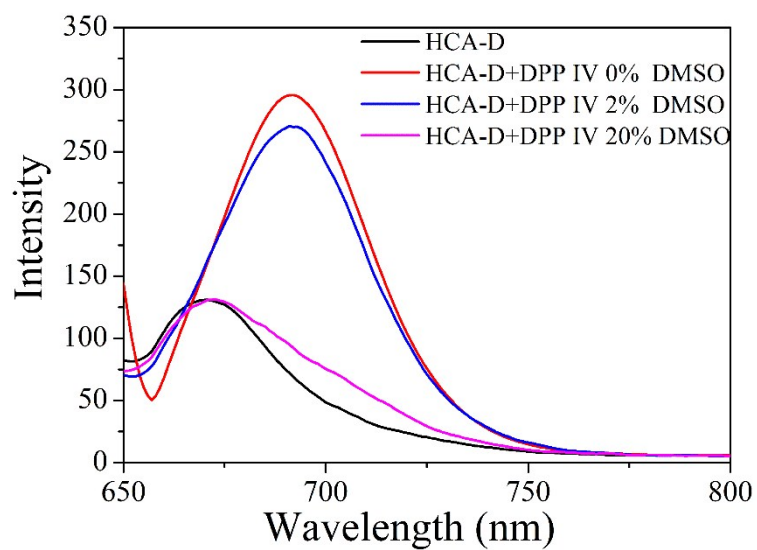

**Figure S12** Effect of the co-solvent system (DMSO and PBS buffer solution) on the fluorescence intensity of HCA-D (20 μM) induced by DPP-IV (40 ng/mL) activity.

## Section 4 Evaluation of the analysis methods for detection of DPP-IV activity

Table S1. A comparison of the fluorescent probes for DPP-IV detection.

| Probe for DPP IV                                                                    | Test system   | $\lambda_{ex}/\lambda_{em}$ (nm) | NIR emission | Linear range ng/mL  | LOD ng/mL | Reference |
|-------------------------------------------------------------------------------------|---------------|----------------------------------|--------------|---------------------|-----------|-----------|
| 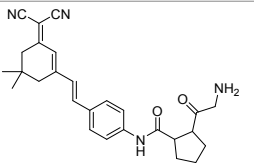   | ACN/PBS = 1:1 | 458/658                          | yes          | 0-1500              | /         | 1         |
|    | ACN/PBS = 1:1 | 360/805<br>455/535               | yes          | 0-80                | 0.78      | 2         |
|    | /             | 585/625                          | yes          | 2-60                | 0.35      | 3         |
|  | HEPES buffer  | 320/450                          | /            | 0.1 to 0.5<br>mU/mL | /         | 4         |
|  | HEPES buffer  | 625/670                          | yes          | /                   | /         | 5         |
|  | PBS buffer    | 640/690                          | yes          | 0.625 -10           | 0.19      | This work |

## Section 5 Inhibition assay of DPP-IV activity

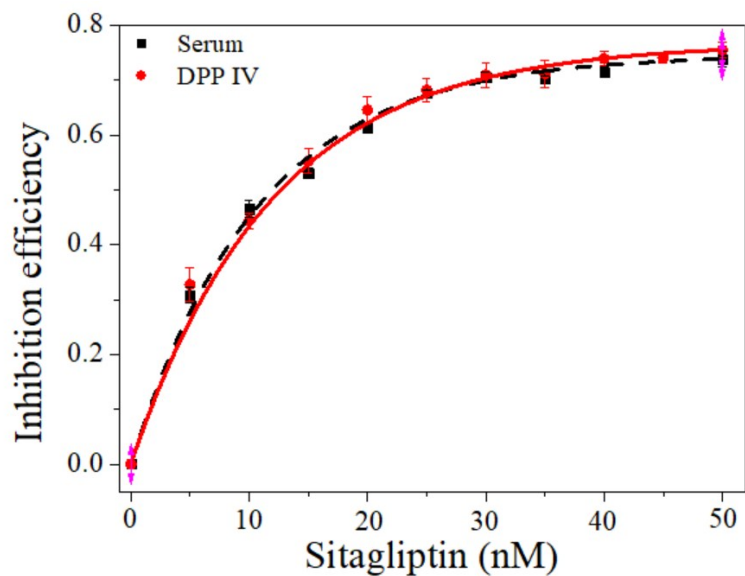

**Figure S13** Dose-inhibition curves of sitagliptin (0-5 nM) on HCA-D hydrolysis in both human serum and recombinant DPP-IV.  $IC_{50} = 12.5$  nM, 12.1 nM, respectively.

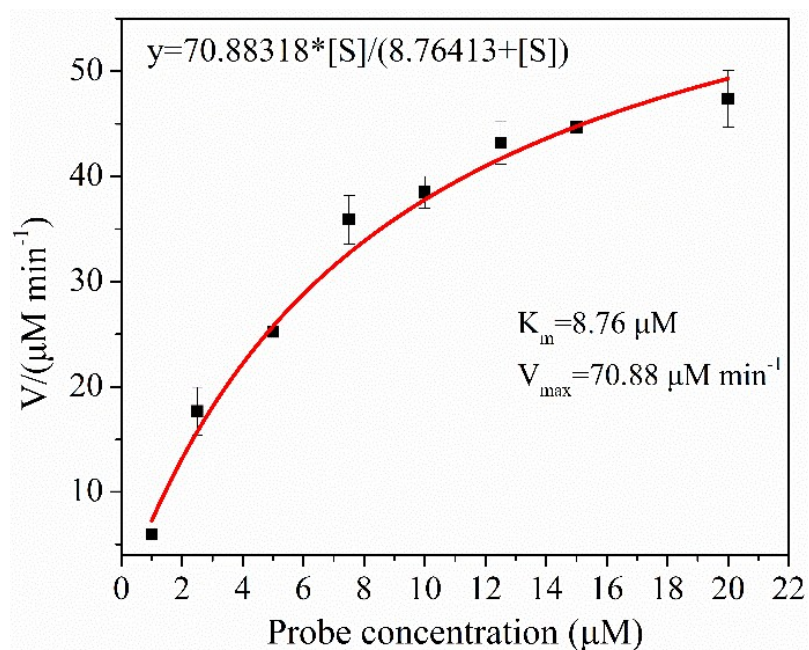

**Figure S14** Michaelis-Menten kinetic plots of HCA-D hydrolysis in DPP-IV.

## Section 6 Determination of DPP-IV activity in practical samples

Table S2 Quantitative detection of DPP-IV activity in human serum samples

| <b>Samples</b> | <b>DPP-IV spiked<br/>( ng/mL )</b> | <b>The total amount of<br/>DPP-IV (ng/mL)</b> | <b>Recovery<br/>rate<br/>(%)</b> | <b>R.S.D.(%)</b> |
|----------------|------------------------------------|-----------------------------------------------|----------------------------------|------------------|
|                | 0.0                                | 4.34                                          | /                                | 4.3              |
| <b>Serum 1</b> | 4.0                                | 8.42                                          | 104                              | 1.7              |
|                | 6.0                                | 9.92                                          | 93                               | 2.3              |
|                | 0.0                                | 4.05                                          | /                                | 1.0              |
| <b>Serum 2</b> | 4.0                                | 8.58                                          | 113                              | 2.2              |
|                | 6.0                                | 10.01                                         | 99                               | 1.6              |
|                | 0.0                                | 3.66                                          | /                                | 4.9              |
| <b>Serum 3</b> | 4.0                                | 7.12                                          | 87                               | 1.8              |
|                | 6.0                                | 9.47                                          | 97                               | 2.5              |

## Section 7 Cell cytotoxicity of HCA-D

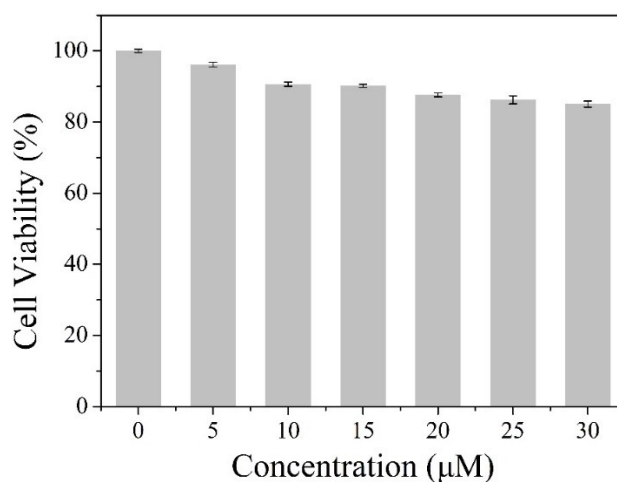

**Figure S15** Effects of probe at varied concentrations on the cell viability of Hela cells.

### References.

1. T. Liu, J. Ning, B. Wang, B. Dong, S. Li, X. Tian, Z. Yu, Y. Peng, C. Wang and X. Zhao, *Analytical Chemistry*, 2018, **90**, acs.analchem.7b04957.
2. L. W. Zou, P. Wang, X. K. Qian, L. Feng, Y. Yu, D. D. Wang, Q. Jin, J. Hou, Z. H. Liu and G. B. Ge, *Biosensors and Bioelectronics*, 2016, **90**, 283-289.
3. Q. Gong, W. Shi, L. Li, X. Wu and H. Ma, *Analytical Chemistry*, 2016, **88**, acs.analchem.6b02231.
4. Y. Wang, X. Wu, Y. Cheng and X. Zhao, *Chemical Communications*, 2016, **52**, 3478-3481.
5. N. H. Ho, R. Weissleder and C. H. Tung, *Bioorganic & Medicinal Chemistry Letters*, 2006, **16**, 2599-2602.
